# Supplementary material for: Subcomplex Iλ Specifically Controls Integrated Mitochondrial Functions in Caenorhabditis elegans
Source: PubMed Central journal article supplement (PMC2719872; doi:10.1371/journal.pone.0006607), 2009-08-12

# Supplementary Figure 3.

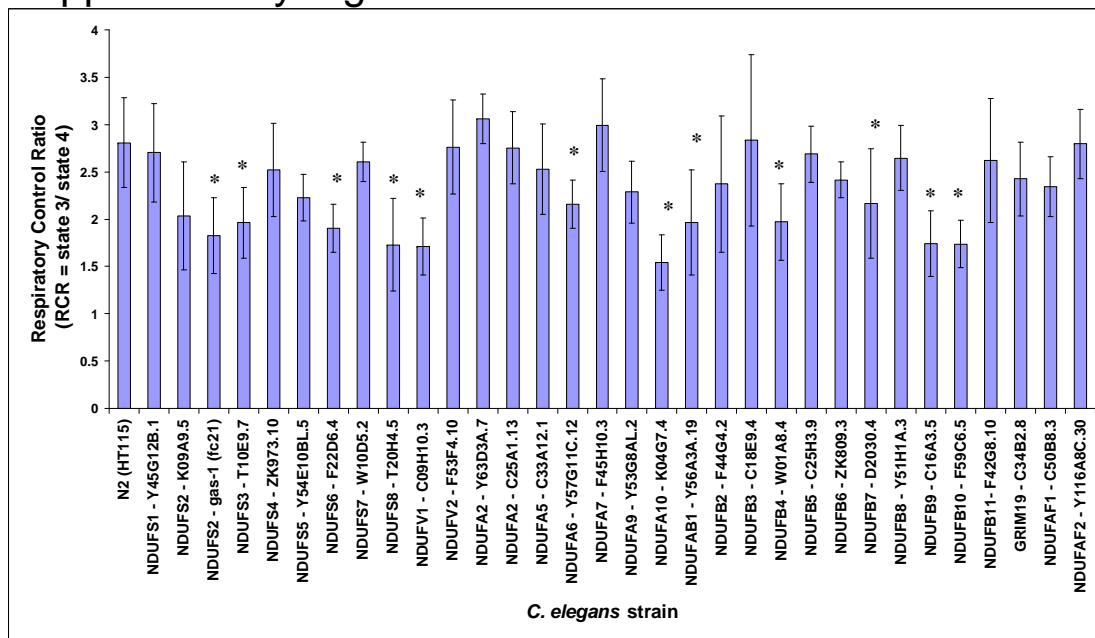

Supplement: pone.0006607.s003.pdf [file pone.0006607.s003.pdf]
