# Supplementary material for: Subcomplex Iλ Specifically Controls Integrated Mitochondrial Functions in Caenorhabditis elegans
Source: PubMed Central journal article supplement (PMC2719872; doi:10.1371/journal.pone.0006607), 2009-08-12
Supplement: pone.0006607.s004.pdf [file pone.0006607.s004.pdf]

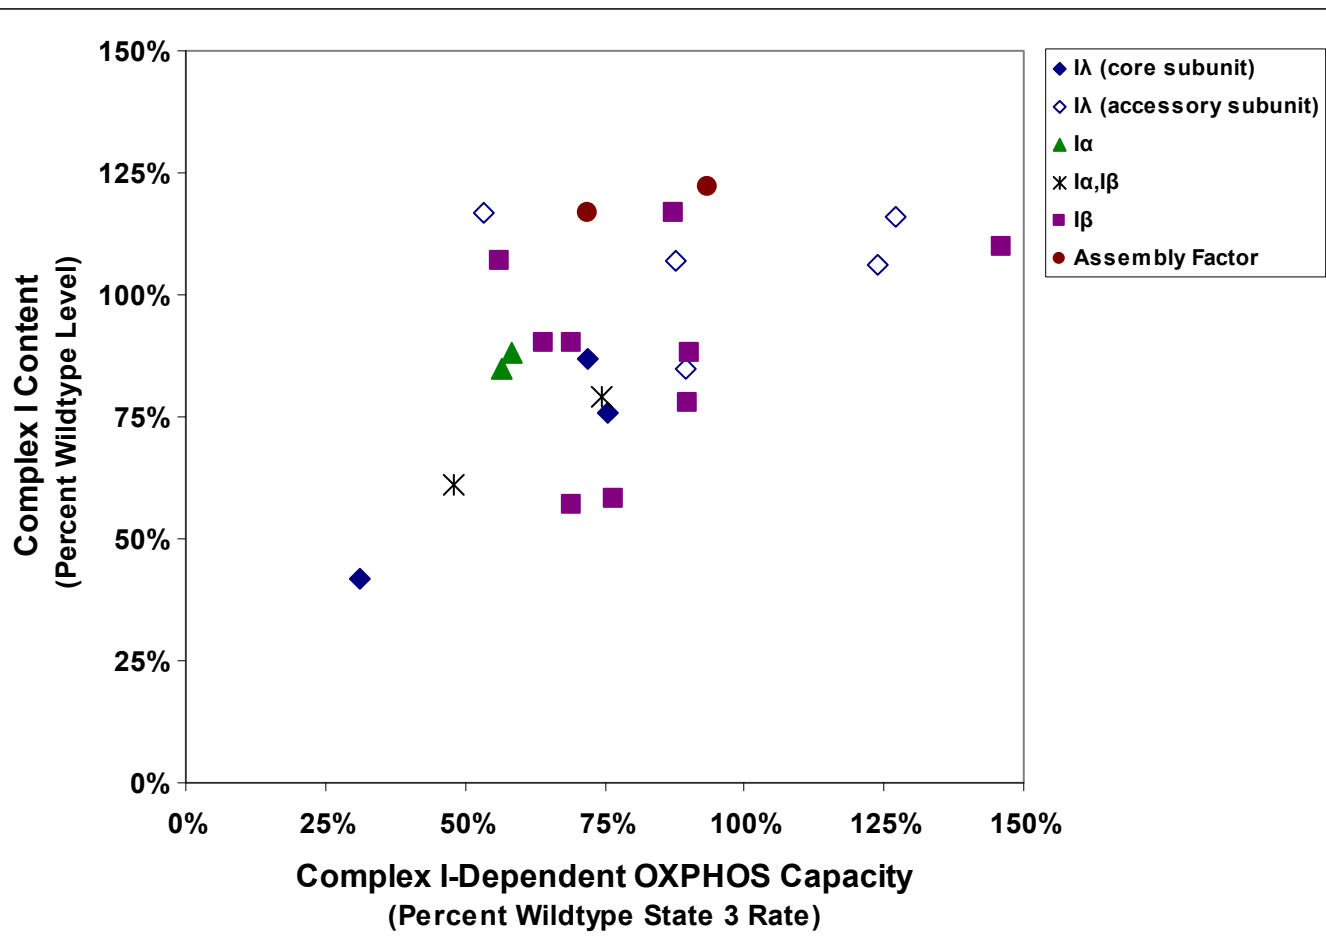

| SUBCOMPLEX             | n  | PEARSON |                |        | SPEARMAN |                |        |
|------------------------|----|---------|----------------|--------|----------|----------------|--------|
|                        |    | r       | r <sup>2</sup> | p      | r        | r <sup>2</sup> | p      |
| ALL SUBUNITS (+2 A.F.) | 33 | 0.50    | 0.28           | 0.0140 | 0.32     | 0.10           | 0.1300 |
| 1λ - all               | 9  | 0.64    | 0.41           | 0.0870 | 0.33     | 0.11           | 0.4200 |
| 1λ - core              | 3  | 0.95    | 0.91           | 0.2000 | 0.50     | 0.25           | 0.6700 |
| 1λ - accessory         | 6  | -0.02   | 0.00           | 0.9700 | -0.30    | 0.09           | 0.6200 |
| 1α + 1λ                | 13 | 0.67    | 0.45           | 0.0180 | 0.46     | 0.21           | 0.1300 |
| 1β                     | 11 | 0.44    | 0.19           | 0.1800 | 0.19     | 0.035          | 0.5800 |
| All accessory subunits | 19 | 0.42    | 0.18           | 0.0830 | 0.18     | 0.034          | 0.4700 |
